# Supplementary material for: Stable lithium metal batteries enabled by localized high-concentration electrolytes with sevoflurane as a diluent
Source: Royal Society of Chemistry journal article supplement (doi:10.1039/d1ta10618j), 2022-01-01
Supplement: d1ta10618j1.pdf [file d1ta10618j1.pdf]

# Stable Lithium Metal Batteries Enabled by Localized High-Concentration Electrolytes with Sevoflurane as a Diluent

*Caiyun Chang<sup>a,b</sup>, Yuan Yao<sup>a,b</sup>, Rongrong Li<sup>b</sup>, Zifeng Cong<sup>b,c</sup>, Longwei Li<sup>b,c</sup>, Zi Hao Guo<sup>b,c</sup>,  
Weiguo Hu<sup>a,b,c</sup>, Xiong Pu<sup>a, b,c\*</sup>*

<sup>a</sup>School of Chemistry and Chemical Engineering, Center on Nanoenergy Research, School of Physical Science and Technology, Guangxi University, Nanning 530004, China.

<sup>b</sup>CAS Center for Excellence in Nanoscience, Beijing Key Laboratory of Micro-Nano Energy and Sensor, Beijing Institute of Nanoenergy and Nanosystems, Chinese Academy of Sciences, Beijing 101400, China.

<sup>c</sup>School of Nanoscience and Technology, University of Chinese Academy of Sciences, Beijing 100049, China.

\*Corresponding author.

Prof. X. Pu. E-mail: [puxiong@binn.cas.cn](mailto:puxiong@binn.cas.cn)

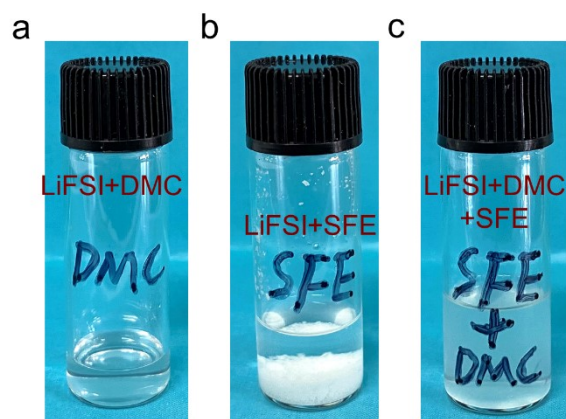

**Figure S1.** The solubility of LiFSI in SFE and DMC solutions. Photos are taken after 5.0 M LiFSI is added to DMC. (a) LiFSI was completely dissolved immediately. (b) As a sharp contrast, LiFSI was almost completely insoluble in SFE diluent. (c) SFE is highly miscible with a solution of LiFSI in DMC.

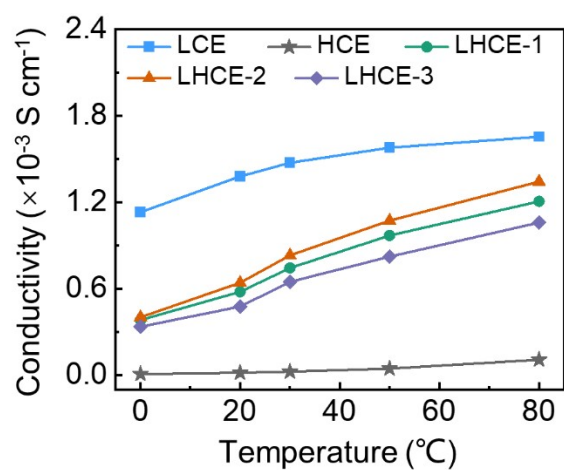

**Figure S2.** Ion conductivity of the electrolyte combined with 5 separators in LCE, HCE, and LHCEs with different molar ratio of DMC and SFE.

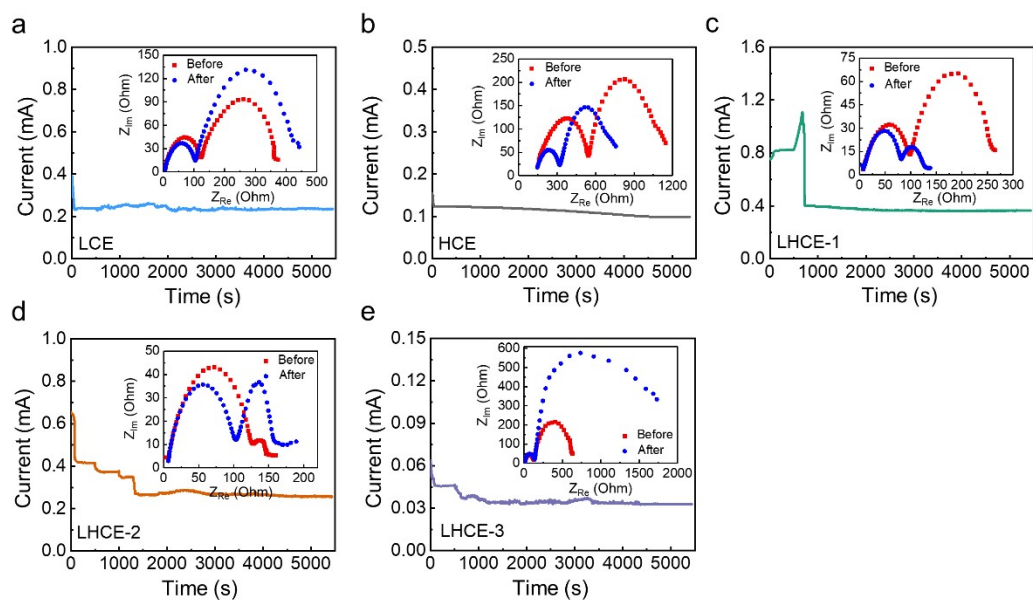

**Figure S3.** The lithium transference number (LTN) measurement of the (a) LCE, (b) HCE, (c) LHCE-1, (d) LHCE-2, and (e) LHCE-3 in Li||Li symmetric cells.

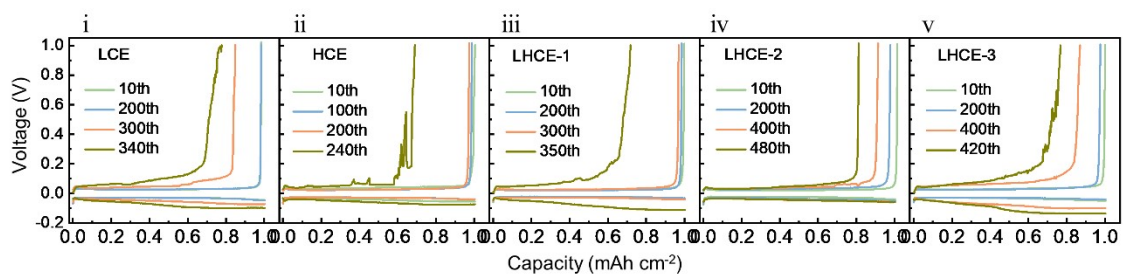

**Figure S4.** The voltage profiles of Li||Cu cells at selected cycled in different electrolytes.

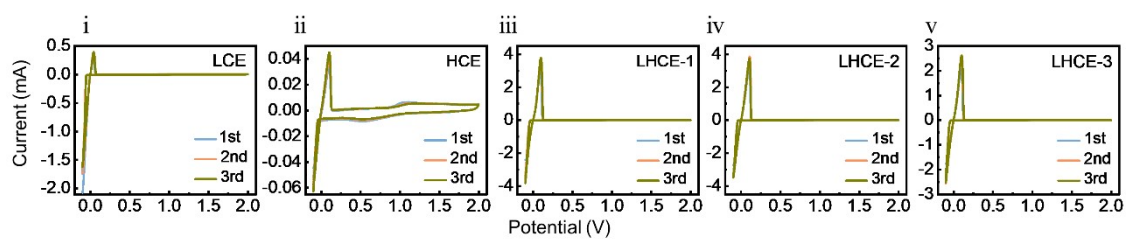

**Figure S5.** The CV cycles of Li||Cu cells with five different electrolytes (voltage range: -1 V to 2.0 V, scanning rate:  $0.1 \text{ mV s}^{-1}$ ).

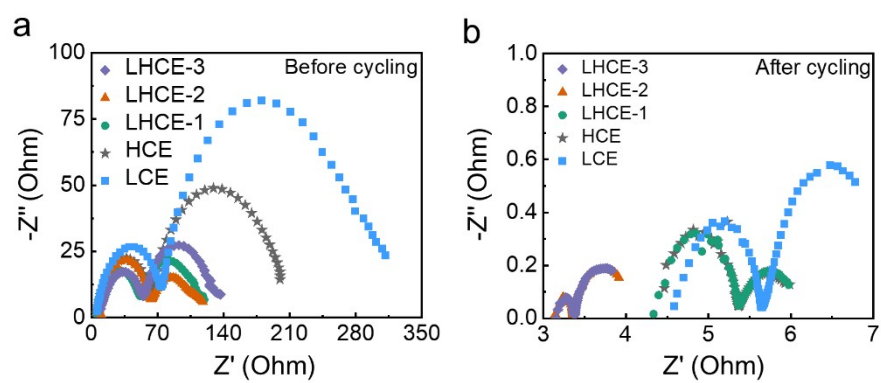

**Figure S6.** EIS results of Li||Li symmetric cells (a) before cycling, and (b) after long term cycling.

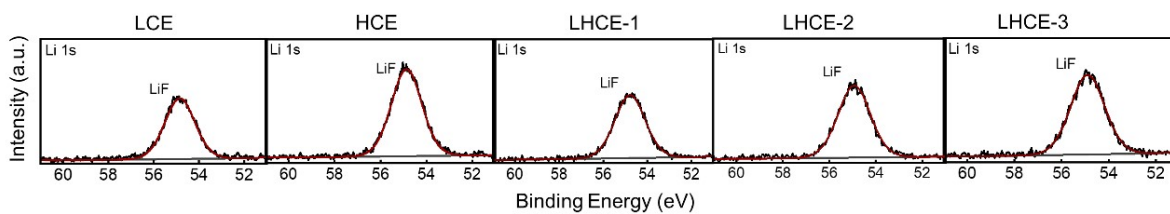

**Figure S7.** XPS analysis of the SEI composition on Li-metal anodes. Li 1s spectra of the SEI layers on Li electrodes after five cycles in different carbonate-based electrolytes.



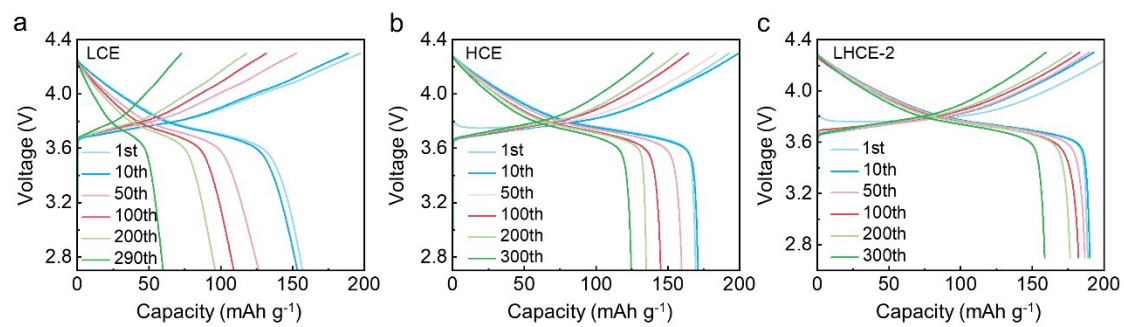

**Figure S8.** Voltage profiles upon cycling in (a) LCE, (b) HCE, and (c) LHCE-2.

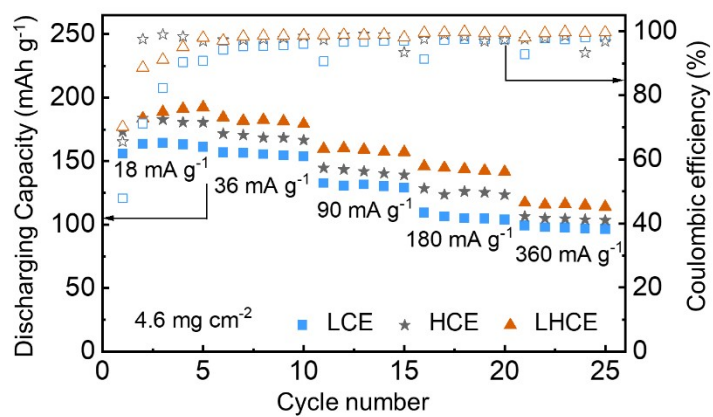

**Figure S9.** Rate performance of Li||NCM811 full cells using LCE, HCE, and LHCE-2 electrolytes.

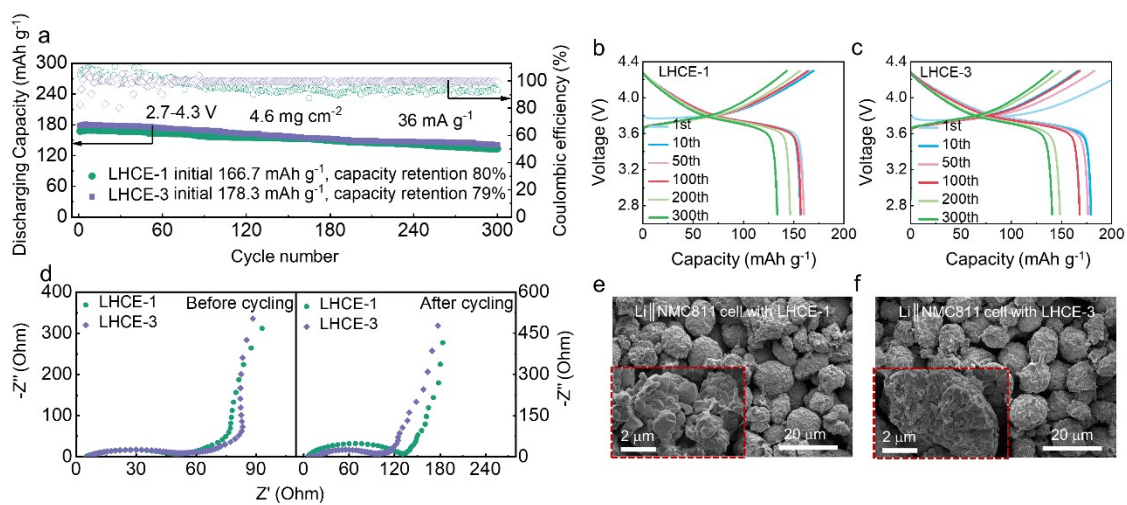

**Figure S10.** Electrochemical behavior and morphologies of Li||NMC811 full cells in the LHCE-1 and LHCE-3. (a) Cycling performance of Li||NMC811 cells. Voltage profiles of Li||NMC811 cells in (b) LHCE-1 and (c) LHCE-3. (d) EIS comparison of full cells before and after 300 cycles in two electrolytes. SEM images of the cycled cathodes using (e) LHCE-1 and (f) LHCE-3.

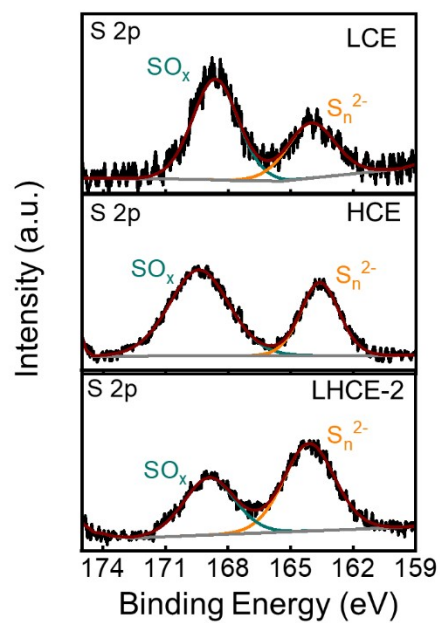

**Figure S11.** S 2p XPS spectra of the NMC811 cathodes cycled in LCE, HCE, and LHCE-2.

**Table S1.** Comparison of physical properties of BTFE, TTE, TEEO, and SFE.

| Parameter                             | BTFE                                                                              | TTE                                                                               | TEEO                                                                               | SFE                                                                                 |
|---------------------------------------|-----------------------------------------------------------------------------------|-----------------------------------------------------------------------------------|------------------------------------------------------------------------------------|-------------------------------------------------------------------------------------|
| Molecular Formula                     | C <sub>4</sub> H <sub>4</sub> F <sub>6</sub> O                                    | C <sub>5</sub> H <sub>4</sub> F <sub>8</sub> O                                    | C <sub>7</sub> H <sub>7</sub> F <sub>9</sub> O <sub>3</sub>                        | C <sub>4</sub> H <sub>3</sub> F <sub>7</sub> O                                      |
| Structural Formula                    | 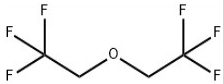 |  |  |  |
| Formula Weight (g mol <sup>-1</sup> ) | 182.06                                                                            | 232.07                                                                            | 310.12                                                                             | 200.05                                                                              |
| Proportion of F (%)                   | 62.62                                                                             | 65.50                                                                             | 55.14                                                                              | 66.48                                                                               |
| Boiling point (°C)                    | 63                                                                                | 92                                                                                | 164.7                                                                              | 58                                                                                  |
| Density (g cm <sup>-3</sup> )         | 1.404                                                                             | 1.533                                                                             | 1.51                                                                               | 1.505                                                                               |
| Price                                 | 1g/\$63.16                                                                        | 1g/\$11.05                                                                        | 1g/\$236.85                                                                        | 1g/\$44.21                                                                          |
| storage temp                          | -80°C, 6 months; -20°C, 1 month (sealed storage, away from moisture)              | Sealed in dry, Room Temperature                                                   | storage at -4°C, 1~2 weeks; longer storage period at -20°C, 1~2 years              | Refrigerator                                                                        |
| Hazard Codes                          | F, Xi,T                                                                           | Xi                                                                                | Xi                                                                                 | Xi                                                                                  |
| Hazard Class                          | Flammable/Toxic/Convulsant                                                        | IRRITANT                                                                          | IRRITANT                                                                           | IRRITANT                                                                            |

**Table S2.** Comparison of electrochemical performances of lithium battery using BTFE, TTE, TEEO, and SFE as inert diluents.

| Electrolyte                                     | Cell chemistry       | Current density         | Performances                                    | References                                                 |
|-------------------------------------------------|----------------------|-------------------------|-------------------------------------------------|------------------------------------------------------------|
| LiFSI/DMC/BTFE<br>(0.41:1:2 by molar)           | Li  Cu               | 1.0 mA cm <sup>-2</sup> | Avg. CE: 99.4% after<br>11 cycles               | Chen et al, Adv.<br>Mater. 2018, 30,<br>1706102.           |
|                                                 | 450 μm               | 5.0 mA cm <sup>-2</sup> | Avg. CE: 92.6% after<br>11 cycles               |                                                            |
|                                                 | Li  NMC333           | 2.0 mA cm <sup>-2</sup> | 80% capacity retention<br>after 700 cycles      |                                                            |
| LiFSI/DME/TTE<br>(1:1.2:3 by molar)             | Li  Cu               | 0.5 mA cm <sup>-2</sup> | Avg. CE: 99.3% after<br>300 cycles              | Ren et al, Joule,<br>2019, 3, 1662.                        |
|                                                 | 450 μm<br>Li  NMC811 | 0.5 mA cm <sup>-2</sup> | ~87% capacity retention<br>after 300 cycles     |                                                            |
| LiFSI/DMC/TTE<br>(0.67:1:1 by molar)            | Li  Cu               | 1.0 mA cm <sup>-2</sup> | Avg. CE: 98.6% after<br>400 cycles              | Piao et al, Adv.<br>Energy Mater.<br>2020, 10,<br>1903568. |
|                                                 | Li  NMC622           | 2.0 C                   | 80.1% capacity<br>retention after 200<br>cycles |                                                            |
| LiFSI/DME/TEEO<br>(1:1.2:2 by molar)            | Li  Cu               | 0.5 mA cm <sup>-2</sup> | Avg. CE: 99.2% after<br>5000 min                | Cao et al,<br>Energy Storage<br>Mater. 2021, 34,<br>76.    |
|                                                 | 50 μm<br>Li  NMC811  | 1.4 mA cm <sup>-2</sup> | 80 % capacity retention<br>after 205 cycles     |                                                            |
| LHCE-2<br>(LiFSI/DMC/SFE,<br>0.42:1:1 by molar) | Li  Cu               | 1.0 mA cm <sup>-2</sup> | Avg. CE: 95% after 480<br>cycles                | <b>This work</b>                                           |
|                                                 | Li  Cu               | 5.0 mA cm <sup>-2</sup> | Avg. CE: 99.5% after<br>225 cycles              |                                                            |
|                                                 | 100 μm<br>Li  NMC811 | 36 mA g <sup>-1</sup>   | 84 % capacity retention<br>after 300 cycles     |                                                            |
